# Supplementary material for: Reductive dechlorination of BCl3 for efficient ammonia borane regeneration
Source: Royal Society of Chemistry journal article supplement (doi:10.1039/c4dt01592d), 2014-10-31
Supplement: c4dt01592d1.pdf [file c4dt01592d1.pdf]

# Reductive Dechlorination of $\text{BCl}_3$ for Efficient Ammonia Borane Regeneration

Yingbin Tan, Lijun Zhang, Xiaowei Chen and Xuebin Yu\*

*Department of Materials Science, Fudan University, Shanghai 200433, China;*

\* To whom correspondence should be addressed:

Phone and Fax: +86-21-5566 4581. *E-mail:* [yuxuebin@fudan.edu.cn](mailto:yuxuebin@fudan.edu.cn) (XB Yu)

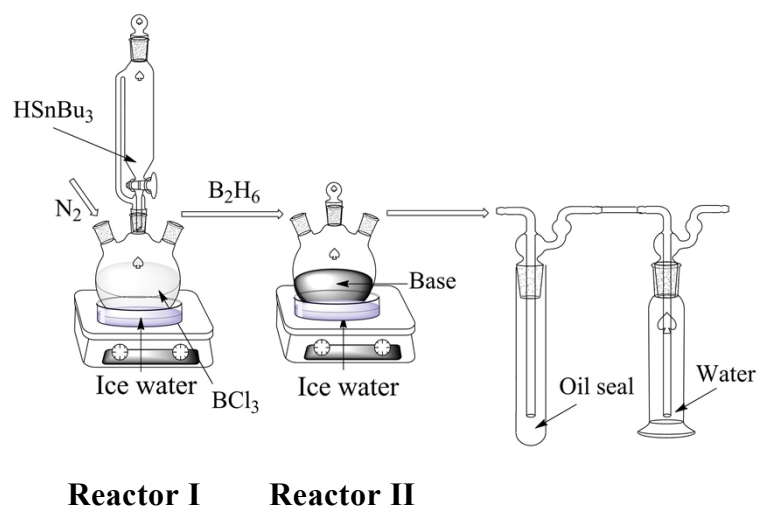

**Fig. S1** A schematic illustration of the preparation of AB. Reactor I and Reactor II correspond to the reactions of eq. (1), eq. (2) and (3), respectively.

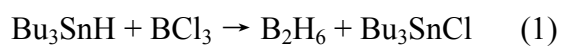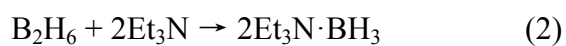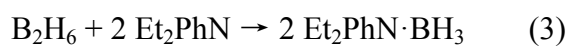

## Thermodynamic Considerations

$$\text{Efficiency} = \frac{(\text{equiv } H_2 \text{ stored})(57.8)}{(\text{equiv } H_2 \text{ used})(57.8) + \sum(\Delta H_{\text{endo}}) - (\% \text{ heat recovery}) \sum(-\Delta H_{\text{endo}})} \quad (4)$$

**Table S1** Reaction equations for deriving efficiency.

| HCl-Bu <sub>3</sub> SnH regeneration scheme                                                                                                 | $\Delta_r H$ / kcal mol <sup>-1</sup> |
|---------------------------------------------------------------------------------------------------------------------------------------------|---------------------------------------|
| 1/3B <sub>3</sub> N <sub>3</sub> H <sub>6</sub> (l) + 4HCl (g) → BCl <sub>3</sub> (g) + NH <sub>4</sub> Cl (s) + 1H <sub>2</sub> (g)        | -39.9                                 |
| NH <sub>4</sub> Cl (s) → NH <sub>3</sub> (g) + HCl (g)                                                                                      | 42.1                                  |
| BCl <sub>3</sub> (g) + 3Bu <sub>3</sub> SnH (l) + Et <sub>2</sub> PhN (l) → Et <sub>2</sub> PhN·BH <sub>3</sub> (l) + 3Bu <sub>3</sub> SnCl | -26.8                                 |
| 3Bu <sub>3</sub> SnCl (l) + 3HCOOH (l) → 3Bu <sub>3</sub> SnCOOH (l) + 3HCl (g)                                                             | 37.2                                  |
| 3Bu <sub>3</sub> SnCOOH (l) → 3Bu <sub>3</sub> SnH (l) + 3CO <sub>2</sub> (g)                                                               | 38.7                                  |
| 3CO <sub>2</sub> (g) + 3H <sub>2</sub> (g) → 3HCOOH (l)                                                                                     | -22.95                                |
| Et <sub>2</sub> PhN·BH <sub>3</sub> (l) + NH <sub>3</sub> (g) → BH <sub>3</sub> NH <sub>3</sub> (s) + Et <sub>2</sub> PhN (l)               | -22.7                                 |
| total: 1/3B <sub>3</sub> N <sub>3</sub> H <sub>6</sub> (l) + 2H <sub>2</sub> (g) → BH <sub>3</sub> NH <sub>3</sub> (s)                      | + 5.66                                |
| sum of exothermicities:                                                                                                                     | -112.35                               |
| sum of endothermicities:                                                                                                                    | +118                                  |
| efficiency with 0% heat recovery: 40 %                                                                                                      |                                       |
| efficiency with 20% heat recovery: 43 %                                                                                                     |                                       |

The heat of formation  $\Delta H_f$  (298 K) of Et<sub>2</sub>PhN·BH<sub>3</sub> was determined by the following reaction of eq. (5). The value of  $\Delta_r H$  was -2.52 kcal mol<sup>-1</sup>.

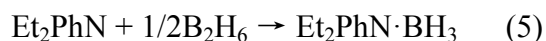

**Table S2** Reaction equations for deriving efficiency. <sup>S1</sup>

| HCl-H <sub>2</sub> /Ni <sub>3</sub> B regeneration scheme                                                                                                                                 | $\Delta_r H / \text{kcal mol}^{-1}$ |
|-------------------------------------------------------------------------------------------------------------------------------------------------------------------------------------------|-------------------------------------|
| $1/3\text{B}_3\text{N}_3\text{H}_6 (\text{l}) + 4\text{HCl} (\text{g}) \rightarrow \text{BCl}_3 (\text{g}) + \text{NH}_4\text{Cl} (\text{s}) + 1\text{H}_2 (\text{g})$                    | -39.9                               |
| $\text{NH}_4\text{Cl} (\text{s}) \rightarrow \text{NH}_3 (\text{g}) + \text{HCl} (\text{g})$                                                                                              | +42.1                               |
| $\text{BCl}_3 (\text{g}) + \text{Et}_3\text{N} (\text{l}) \rightarrow \text{Et}_3\text{NBCl}_3 (\text{solv.})$                                                                            | -29.64                              |
| $\text{Et}_3\text{NBCl}_3 (\text{solv.}) + 3\text{H}_2 (\text{g}) + 3\text{Et}_3\text{N} \rightarrow \text{Et}_3\text{N}\cdot\text{BH}_3 (\text{l}) + 3\text{Et}_3\text{NHCl} (\text{s})$ | -89.44                              |
| $3\text{Et}_3\text{NHCl} (\text{s}) \rightarrow 3\text{Et}_3\text{N} (\text{g}) + 3\text{HCl} (\text{g})$                                                                                 | +145.02                             |
| $\text{Et}_3\text{N}\cdot\text{BH}_3 (\text{l}) + \text{NH}_3 (\text{l}) \rightarrow \text{NH}_3\text{BH}_3 (\text{s}) + \text{Et}_3\text{N} (\text{l})$                                  | -13.14                              |
| heat of condensation of ammonia = -3.15 kcal mol <sup>-1</sup>                                                                                                                            | -9.46                               |
| total: $1/3\text{B}_3\text{N}_3\text{H}_6 (\text{l}) + 2\text{H}_2 (\text{g}) \rightarrow \text{BH}_3\text{NH}_3 (\text{s})$                                                              | + 5.54                              |
| sum of exothermicities:                                                                                                                                                                   | -181.58                             |
| sum of endothermicities:                                                                                                                                                                  | +187.12                             |
| efficiency with 0% heat recovery: 35 %                                                                                                                                                    |                                     |
| efficiency with 20% heat recovery: 38 %                                                                                                                                                   |                                     |

**Table S3** Reaction equations for deriving efficiency. <sup>S2</sup>

| C <sub>6</sub> H <sub>6</sub> S <sub>2</sub> -Bu <sub>3</sub> SnH-Bu <sub>2</sub> SnH <sub>2</sub> regeneration scheme                                                                                                                                             | Δ <sub>r</sub> H / kcal mol <sup>-1</sup> |
|--------------------------------------------------------------------------------------------------------------------------------------------------------------------------------------------------------------------------------------------------------------------|-------------------------------------------|
| 1/3B <sub>3</sub> N <sub>3</sub> H <sub>6</sub> (l) + C <sub>6</sub> H <sub>4</sub> (SH) <sub>2</sub> (l) → C <sub>6</sub> H <sub>4</sub> S <sub>2</sub> BH(NH <sub>3</sub> ) (l)                                                                                  | -6.8                                      |
| 1/2C <sub>6</sub> H <sub>4</sub> S <sub>2</sub> BH(NH <sub>3</sub> ) (l) + 1/2C <sub>6</sub> H <sub>4</sub> (SH) <sub>2</sub> (l) → 1/2[NH <sub>4</sub> ][B(C <sub>6</sub> H <sub>4</sub> S <sub>2</sub> ) <sub>2</sub> ] (s) + 1/2H <sub>2</sub> (g)              | 7.0                                       |
| 1/2[NH <sub>4</sub> ][B(C <sub>6</sub> H <sub>4</sub> S <sub>2</sub> ) <sub>2</sub> ] (s) + 1/2Bu <sub>3</sub> SnH (l) → 1/2C <sub>6</sub> H <sub>4</sub> S <sub>2</sub> BH(NH <sub>3</sub> ) (l) + 1/2C <sub>6</sub> H <sub>4</sub> (SH)(SSnBu <sub>3</sub> ) (l) | -12.4                                     |
| C <sub>6</sub> H <sub>4</sub> S <sub>2</sub> BH(NH <sub>3</sub> ) (l) + Bu <sub>2</sub> SnH <sub>2</sub> (l) → BH <sub>3</sub> NH <sub>3</sub> (s) + C <sub>6</sub> H <sub>4</sub> S <sub>2</sub> SnBu <sub>2</sub> (l)                                            | -9.7                                      |
| C <sub>6</sub> H <sub>4</sub> S <sub>2</sub> SnBu <sub>2</sub> (l) + 2H <sub>2</sub> (g) → C <sub>6</sub> H <sub>4</sub> (SH) <sub>2</sub> (l) + Bu <sub>2</sub> SnH <sub>2</sub> (l)                                                                              | 21.9                                      |
| 1/2C <sub>6</sub> H <sub>4</sub> (SH)(SSnBu <sub>3</sub> ) (l) + 1/2H <sub>2</sub> (g) → 1/2C <sub>6</sub> H <sub>4</sub> (SH) <sub>2</sub> (l) + 1/2Bu <sub>3</sub> SnH (l)                                                                                       | 5.3                                       |
| 1/3B <sub>3</sub> N <sub>3</sub> H <sub>6</sub> (l) + 2H <sub>2</sub> (g) → BH <sub>3</sub> NH <sub>3</sub> (s)                                                                                                                                                    | + 5.4                                     |
| sum of exothermicities:                                                                                                                                                                                                                                            | -28.9                                     |
| sum of endothermicities:                                                                                                                                                                                                                                           | 34.3                                      |
| efficiency with 0% heat recovery:                                                                                                                                                                                                                                  | 65 %                                      |
| efficiency with 20% heat recovery:                                                                                                                                                                                                                                 | 67 %                                      |

**Table S4** Reaction equations for deriving efficiency. <sup>S2, S3</sup>

| C <sub>6</sub> H <sub>6</sub> S <sub>2</sub> -Bu <sub>3</sub> SnH-Bu <sub>2</sub> SnH <sub>2</sub> regeneration scheme                                                                                                                                                | Δ <sub>r</sub> H / kcal mol <sup>-1</sup> |
|-----------------------------------------------------------------------------------------------------------------------------------------------------------------------------------------------------------------------------------------------------------------------|-------------------------------------------|
| 1/3B <sub>3</sub> N <sub>3</sub> H <sub>6</sub> (l) + C <sub>6</sub> H <sub>4</sub> (SH) <sub>2</sub> (l) → C <sub>6</sub> H <sub>4</sub> S <sub>2</sub> BH(NH <sub>3</sub> ) (l)                                                                                     | -6.8                                      |
| 1/2C <sub>6</sub> H <sub>4</sub> S <sub>2</sub> BH(NH <sub>3</sub> ) (l) + 1/2C <sub>6</sub> H <sub>4</sub> (SH) <sub>2</sub> (l) → 1/2[NH <sub>4</sub> ][B(C <sub>6</sub> H <sub>4</sub> S <sub>2</sub> ) <sub>2</sub> ]<br>(s) + 1/2H <sub>2</sub> (g)              | 7.0                                       |
| 1/2[NH <sub>4</sub> ][B(C <sub>6</sub> H <sub>4</sub> S <sub>2</sub> ) <sub>2</sub> ] (s) + 1/2Bu <sub>3</sub> SnH (l) → 1/2C <sub>6</sub> H <sub>4</sub> S <sub>2</sub> BH(NH <sub>3</sub> ) (l)<br>+ 1/2C <sub>6</sub> H <sub>4</sub> (SH)(SSnBu <sub>3</sub> ) (l) | -12.4                                     |
| C <sub>6</sub> H <sub>4</sub> S <sub>2</sub> BH(NH <sub>3</sub> ) (l) + Et <sub>2</sub> NH (l) → C <sub>6</sub> H <sub>4</sub> S <sub>2</sub> BH(Et <sub>2</sub> NH) (l) + NH <sub>3</sub> (g)                                                                        | 1.6                                       |
| C <sub>6</sub> H <sub>4</sub> S <sub>2</sub> BH(Et <sub>2</sub> NH) (l) + 2Bu <sub>3</sub> SnH (l) → C <sub>6</sub> H <sub>4</sub> (SSnBu <sub>3</sub> ) <sub>2</sub> (l) +<br>Et <sub>2</sub> NH·BH <sub>3</sub> (l)                                                 | 9.5                                       |
| Et <sub>2</sub> NH·BH <sub>3</sub> (l) + NH <sub>3</sub> (l) → BH <sub>3</sub> NH <sub>3</sub> (s) + Et <sub>2</sub> NH (l)                                                                                                                                           | -12.3                                     |
| 1/2C <sub>6</sub> H <sub>4</sub> (SH)(SSnBu <sub>3</sub> ) (l) + 1/2HCl (g) → 1/2C <sub>6</sub> H <sub>4</sub> (SH) <sub>2</sub> (l) +<br>1/2Bu <sub>3</sub> SnCl (l)                                                                                                 | -5                                        |
| C <sub>6</sub> H <sub>4</sub> (SSnBu <sub>3</sub> ) <sub>2</sub> (l) + 2HCl (g) → C <sub>6</sub> H <sub>4</sub> (SH) <sub>2</sub> (l) + 2Bu <sub>3</sub> SnCl (l)                                                                                                     | -20.2                                     |
| 5/2Bu <sub>3</sub> SnCl (l) + 5/2HCOOH (l) → 5/2Bu <sub>3</sub> SnCOOH (l) + 5/2HCl (g)                                                                                                                                                                               | 31                                        |
| 5/2Bu <sub>3</sub> SnCOOH (l) → 5/2Bu <sub>3</sub> SnH (l) + 5/2CO <sub>2</sub> (g)                                                                                                                                                                                   | 32.25                                     |
| 5/2CO <sub>2</sub> (g) + 5/2H <sub>2</sub> (g) → 5/2HCOOH (l)                                                                                                                                                                                                         | -19.125                                   |
| 1/3B <sub>3</sub> N <sub>3</sub> H <sub>6</sub> (l) + 2H <sub>2</sub> (g) → BH <sub>3</sub> NH <sub>3</sub> (s)                                                                                                                                                       | + 5.52                                    |
| sum of exothermicities:                                                                                                                                                                                                                                               | -75.825                                   |
| sum of endothermicities:                                                                                                                                                                                                                                              | +81.35                                    |
| efficiency with 0% heat recovery:                                                                                                                                                                                                                                     | 51 %                                      |
| efficiency with 20% heat recovery:                                                                                                                                                                                                                                    | 55 %                                      |

**Table S5** Reaction equations for deriving efficiency. <sup>S2</sup>

| CH <sub>3</sub> OH-LiAlH <sub>4</sub> -NH <sub>4</sub> Cl regeneration scheme                                                                                                                                                  | $\Delta_r H / \text{kcal mol}^{-1}$ |
|--------------------------------------------------------------------------------------------------------------------------------------------------------------------------------------------------------------------------------|-------------------------------------|
| NH <sub>4</sub> B(OMe) <sub>4</sub> (s) + NH <sub>4</sub> Cl (s) + LiAlH <sub>4</sub> (s) → NH <sub>3</sub> BH <sub>3</sub> (s) +<br>Al(OMe) <sub>3</sub> (l) + MeOH (l) + H <sub>2</sub> (g) + LiCl (s) + NH <sub>3</sub> (g) | -62.4                               |
| NaCl (s) + electricity → Na (s) + 1/2Cl <sub>2</sub> (g)                                                                                                                                                                       | 98.2                                |
| 1/2Cl <sub>2</sub> (g) + 1/2H <sub>2</sub> (g) → HCl (g)                                                                                                                                                                       | -22.1                               |
| HCl (g) + NH <sub>3</sub> (g) → NH <sub>4</sub> Cl (s)                                                                                                                                                                         | -42.1                               |
| Al(OMe) <sub>3</sub> (l) + 3/2H <sub>2</sub> (g) + electricity → Al (s) + 3MeOH (l)                                                                                                                                            | 45.0                                |
| Na (s) + Al (s) + 2H <sub>2</sub> (g) → NaAlH <sub>4</sub> (s)                                                                                                                                                                 | -27.6                               |
| LiCl (s) + NaAlH <sub>4</sub> (s) → LiAlH <sub>4</sub> (s) + NaCl (s)                                                                                                                                                          | 2.4                                 |
| NH <sub>4</sub> B(OMe) <sub>4</sub> (s) + 3H <sub>2</sub> (g) → NH <sub>3</sub> BH <sub>3</sub> (s) + 4MeOH (l)                                                                                                                | - 8.6                               |
| sum of exothermicities:                                                                                                                                                                                                        | -154.2                              |
| sum of endothermicities:                                                                                                                                                                                                       | 145.6                               |
| efficiency with 0% heat recovery:                                                                                                                                                                                              | 46 %                                |
| efficiency with 20% heat recovery:                                                                                                                                                                                             | 50 %                                |

**Table S6** heat of formation  $\Delta_f H$ .

| substance                                                                             | heat of formation $\Delta_f H$ in<br>kcal/mol | literature     |
|---------------------------------------------------------------------------------------|-----------------------------------------------|----------------|
| BH <sub>3</sub> NH <sub>3</sub> (s)                                                   | -36.6 ± 2.4                                   | S1             |
| B <sub>3</sub> N <sub>3</sub> H <sub>6</sub> (l)                                      | -125.9                                        | S1             |
| HCl (g)                                                                               | -22.06                                        | S1             |
| BCl <sub>3</sub> (g)                                                                  | -96.31                                        | S1             |
| NH <sub>3</sub> (l)                                                                   | -6.25                                         | S1             |
| NH <sub>3</sub> (g)                                                                   | -10.98                                        | S1             |
| NH <sub>4</sub> Cl (s)                                                                | -75.18                                        | S1             |
| NaOH(aq)                                                                              | -104.9                                        | S1             |
| H <sub>2</sub> O                                                                      | -68.315                                       | S1             |
| NaCl (aq)                                                                             | -97.4                                         | S1             |
| N <sub>2</sub> (g)                                                                    | 0                                             |                |
| H <sub>2</sub> (g)                                                                    | 0                                             |                |
| Cl <sub>2</sub> (g)                                                                   | 0                                             |                |
| Bu <sub>3</sub> SnH (l)                                                               | -45.3                                         | S2             |
| Bu <sub>2</sub> SnH <sub>2</sub> (l)                                                  | -21.8                                         | S2             |
| C <sub>6</sub> H <sub>6</sub> S <sub>2</sub> (l)                                      | 29.7                                          | S2             |
| (C <sub>6</sub> H <sub>5</sub> S) <sub>2</sub> BH(NH <sub>3</sub> ) (l)               | -2.6                                          | S2             |
| (C <sub>6</sub> H <sub>5</sub> S <sub>2</sub> ) <sub>2</sub> BH(NH <sub>3</sub> ) (l) | -19.1                                         | S2             |
| C <sub>6</sub> H <sub>4</sub> (SSnBu <sub>3</sub> ) <sub>2</sub> (l)                  | -76.7                                         | S2             |
| C <sub>6</sub> H <sub>4</sub> S <sub>2</sub> SnBu <sub>2</sub> (l)                    | -14.0                                         | S2             |
| C <sub>6</sub> H <sub>4</sub> (SH)SSnBu <sub>3</sub> (l)                              | -23.6                                         | S2             |
| NH <sub>4</sub> B(C <sub>6</sub> H <sub>4</sub> S <sub>2</sub> ) (l)                  | 24.7                                          | S2             |
| NH <sub>4</sub> B(OCH <sub>3</sub> ) <sub>4</sub> (s)                                 | -256.2                                        | S2             |
| Al(OCH <sub>3</sub> ) <sub>3</sub> (s)                                                | -216.1                                        | S2             |
| Et <sub>2</sub> PhN (l)                                                               | 0.43                                          | S4             |
| HCOOH (l)                                                                             | -101.7                                        | S5             |
| CO <sub>2</sub> (g)                                                                   | -94.05                                        | S6             |
| B <sub>2</sub> H <sub>6</sub> (g)                                                     | 9.8                                           | S6             |
| N <sub>2</sub> H <sub>4</sub>                                                         | 12.1                                          | S7             |
| Et <sub>2</sub> NH                                                                    | -31.31                                        | S8             |
| Et <sub>2</sub> PhN·BH <sub>3</sub> (l)                                               | -2.52                                         | own experiment |



## References

- S1 C. Reller, F. O. R. L. Mertens, *Angew. Chem. Int. Ed.*, 2012, **51**, 11731-11735.
- S2 B. L. Davis, D. A. Dixon, E. B. Garner, J. C. Gordon, M. H. Matus, B. Scott, F. H. Stephens, *Angew. Chem. Int. Ed.*, 2009, **48**, 6812-6816.
- S3 A. J. Arduengo, D. A. Dixon, *Main Group Element and Organic Chemistry for Hydrogen Storage and Activation*, DOE Center of Excellence for Chemical Hydrogen Storage, 2009.
- S4 M. A. V. Riberio, M. D. M. C. Riberio, M. F. B. M. Monteiro, M. L. A. C. N. Gomes, J. S. Chickos, A. P. Smith, J. F. Liebman, *Struct. Chem.*, 1996, **7**, 367-373.
- S5 J. P. Guthrie, *J. Am. Chem. Soc.*, 1974, **96**, 3608-3615.
- S6 M.W. Chase, *J. Phys. Chem. Ref. Data, Monograph*, 1998, **9**, 1-1951.
- S7 M. W. Chase, Jr., *NIST-JANAF Thermochemical Tables, Fourth Edition*, J. Phys. Chem. Ref. Data, Monograph 9, 1998, 1-1951.
- S8 M. P. Lemoult, *Recherches theoriques et experimentales sur les chaleurs de combustion et de formation des composés organiques*, *Ann. Chim. Phys.*, 1907, **12**, 395-432.
